1 *Research Article*

2 **CIGB-300 peptide targets the CK2 phospho-acceptor**  
3 **domain on Human Papillomavirus E7 and disrupts the**  
4 **Retinoblastoma (RB) complex in cervical cancer cells**

5 **Authors:** Ailyn C. Ramón<sup>1</sup>, Om Basukala<sup>2</sup>, Paola Massimi<sup>2</sup>, Miranda Thomas<sup>2</sup>, Yasser  
6 **Perera<sup>3</sup>, Lawrence. Banks<sup>2</sup>, Silvio E. Perea<sup>1\*</sup>**

7 **Affiliations:**

8 <sup>1</sup> Molecular Oncology Group, Department of Pharmaceuticals, Biomedical Research  
9 Division, Center for Genetic Engineering and Biotechnology (CIGB), Havana 10600, Cuba.  
10 A.C.R. [ailyn.ramon@cigb.edu.cu](mailto:ailyn.ramon@cigb.edu.cu)

11 <sup>2</sup> Tumor Virology Group, International Center for Genetic Engineering and Biotechnology  
12 (ICGEB), AREA Science Park, Trieste, 34149, Italy. O.M. [basukala@icgeb.org](mailto:basukala@icgeb.org), P.M.  
13 [paola.massimi@icgeb.org](mailto:paola.massimi@icgeb.org), M.T. [miranda.thomas@icgeb.org](mailto:miranda.thomas@icgeb.org).

14 <sup>3</sup> China-Cuba Biotechnology Joint Innovation Center (CCBJIC), Yongzhou Zhong Gu  
15 Biotechnology Co., Ltd, Lengshuitan District, Yongzhou City 425000, Hunan Province,  
16 China. Y.P. [ypererapereranegrin@ccbji.com](mailto:ypererapereranegrin@ccbji.com)

17 \*Correspondence: L.B. [banks@icgeb.org](mailto:banks@icgeb.org); S.E.P [silvio@ccbji.com](mailto:silvio@ccbji.com)

18 **Figures:** 4

19 **Supplementary Figures:** -

20 **Supplementary Tables:** -

21 **Keywords:** HPV E7; protein kinase CK2 inhibitor; CIGB-300; pRB

22

23 **Abstract**

24 CIGB-300 is a clinical-grade anti- Protein Kinase CK2 peptide, binding both its substrate's  
25 phospho-acceptor site and the CK2 $\alpha$  catalytic subunit. The cyclic p15 inhibitory domain of  
26 CIGB-300 was initially selected in a phage display library screen for its ability to bind the  
27 CK2 phospho-acceptor domain of HPV-16 E7. However, the actual role of this targeting in  
28 CIGB-300's antitumoral mechanism remains unexplored. Here, we investigated the physical  
29 interaction of CIGB-300 with HPV-E7 and its impact on CK2-mediated phosphorylation.  
30 Hence, we studied the relevance of targeting E7 phosphorylation for the cytotoxic effect  
31 induced by CIGB-300. Finally, co-immunoprecipitation experiments followed by western  
32 blot were performed to study the impact of the peptide on the E7-pRB interaction.  
33 Interestingly, we found a clear binding of CIGB-300 to the N terminal region of E7 proteins  
34 from HPV-16 type. Accordingly, the in vivo physical interaction of the peptide with HPV-16  
35 E7 reduces the CK2-mediated phosphorylation of E7, as well as its binding to the tumour

36 suppressor pRB. However, the targeting of E7 phosphorylation by CIGB-300 seemed to be  
37 dispensable for the induction of cell death in HPV-18 cervical cancer-derived C4-1 cells.  
38 These findings unveil novel molecular clues to the means by which the CIGB-300 triggers  
39 cell death in cervical cancer cells.

## 40 **1. Introduction**

41 Cervical cancer is the most common cause of cancer-related death for women across the  
42 world. Human papillomavirus (HPV) is the causative agent of cervical cancer and a large  
43 number of other human malignancies [1]. In spite of the decrease in the prevalence and death  
44 rate of cervical cancer, thanks to prophylactic vaccines and earlier diagnosis, cervical cancer  
45 is still a global concern [2]. Prophylactic vaccines prevent HPV infection and consequently  
46 prevent HPV-associated cancers; however, they have no effect on pre-existing HPV  
47 infections and HPV-associated lesions [3]. Current therapeutic strategies include surgical  
48 removal of the lesion and radiotherapy plus cisplatin-based chemotherapy; however, these do  
49 not specifically target the oncogenic properties of HPV and therefore lesion recurrence can  
50 occur [4]. Thus, the scientific community is focused on improving the current therapeutic  
51 approaches, by combining strategies or by searching for novel agents effective at treating  
52 HPV-associated cancer.

53 HPV is a small non-enveloped DNA virus that infects keratinocytes of the differentiating  
54 epithelium of the skin and mucosa. The high-risk HPV-16 and HPV-18 subtypes are  
55 responsible for almost 90% of overall cervical cancer cases, whereas the low-risk types,  
56 including HPV-6 and HPV-11, cause benign genital warts (condylomas) [5]. The viral  
57 proteins E6 and E7 are well-known HPV oncogenes that play a critical role in cellular growth  
58 control pathways, which can also cause cells to undergo transformation [5]. Both viral  
59 proteins enhance tumorigenesis and thus constitute relevant targets for therapeutic  
60 intervention in HPV-induced malignancy. E6 triggers part of its oncogenic activity by  
61 inducing the degradation of the p53 tumour suppressor, as well a number of PDZ domain-  
62 containing proteins. E7 is also a relevant target for HPV-positive cervical cancer therapy [6,  
63 7]. E7 targets the pRB family of tumour suppressors for proteasome-mediated degradation,  
64 facilitating the expression of DNA synthesis machinery in differentiated keratinocytes [8].  
65 Other E7-interacting partners with roles in carcinogenesis include transcriptional regulators,  
66 such as the TATA box-binding protein (TBP), p300/CBP and E2F [9].

67 Phosphorylation is the major post-translational modification of E7 that affects some of these  
68 interactions. In particular, the presence of a CK2 phospho-acceptor site within the CR2  
69 domain of E7 seems to enhance E7 interaction with different cellular target proteins, thereby  
70 increasing the ability of E7 to enhance cell proliferation and, potentially, malignant  
71 transformation [8, 10, 11]. Recently, substitution of CK2 phospho-acceptor sites on the E7  
72 protein by non-phosphorylatable residues (i.e. S32A and S34A) was shown to produce slow-  
73 growing cells with reduced invasion capacity in matrigel-based assays, thus confirming the  
74 important role of CK2-mediated phosphorylation of E7 for maintenance of the cancer  
75 phenotype once the tumour is established [12].

76 The peptide CIGB-300 is a CK2 inhibitor with a dual mechanism; it binds to the conserved  
77 phospho-acceptor sites on the substrates, as well as directly targeting the enzyme [13-15].  
78 Initially, the peptide was selected from a phage display peptide library by its ability to bind  
79 the CK2 phospho-acceptor domain of HPV-16 E7 and block phosphorylation [13]. CIGB-300  
80 inhibits cell proliferation and induces apoptosis in cervical cancer cell lines and halts tumour  
81 growth in an HPV-16 syngenic murine tumour animal model [13, 16, 17]. In the clinical  
82 setting, it has been shown that CIGB-300 is safe and well tolerated in cancer patients and  
83 healthy subjects [18-20]. Specifically, phase I/II studies in locally advanced cervical cancer  
84 patients demonstrated clinical effects of intratumoral injections of CIGB-300 [21-24].  
85 Despite the wide range of preclinical and clinical evidence of CIGB-300's antitumoral  
86 activity in this therapeutic niche, the mechanism through which the peptide affects cervical  
87 cancer cells is not fully elucidated. Previously, investigation of the molecular and cellular  
88 events leading to apoptosis in CIGB-300-treated cancer cell lines suggested  
89 B23/Nucleophosmin as a major target [16]. However, down-regulation of  
90 B23/Nucleophosmin in Acute Myeloid Leukemia cells only partially  
91 recapitulated the cytotoxic effect of the peptide, suggesting other molecular targets [15, 25].

92 For the first time, we explore here the putative interaction of CIGB-300 with E7 oncoprotein  
93 in the cellular context, the relevance of the targeting, and its contribution to the CIGB-300  
94 cytotoxic effect. Our results demonstrate that the effect of CIGB-300 on the CK2-mediated  
95 phosphorylation of E7 does not fully support its cytotoxic effect on cervical cancer. However,  
96 the interaction of the peptide with E7 impairs E7's ability to bind the pRB tumour suppressor.  
97 Altogether, the data provided here provide further molecular evidence as to the means by  
98 which CIGB-300 induces cell death in cervical cancer.

## 99 2. Materials and Methods

### 100 2.1. Cell culture

101 The CaSki, HeLa, SiHa, C4-1 and HEK293 cell lines were obtained from the American Type  
102 Culture Collection (ATCC) and maintained in Dulbecco's modified Eagle's medium  
103 (DMEM) (GIBCO), supplemented with 10% fetal bovine serum (GIBCO), glutamine  
104 (300µg/ml) (GIBCO), and penicillin-streptomycin (100U/ml) (GIBCO).

### 105 2.2. Compounds

106 CIGB-300 was dissolved as a 10mM stock in PBS at room temperature for 5 minutes. For  
107 each experiment, a freshly-made stock was used. CX-4945 was obtained from SelleckChem  
108 and was resuspended as a 10mM stock solution in dimethyl sulfoxide (DMSO). The drugs  
109 were diluted directly into growth media just prior to use.

### 110 2.3. Plasmid constructs

111 The plasmids expressing GST-E7 from HPV subtypes 11, 16, and 18, GST alone and the  
112 GST-fused N-terminal and C-terminal halves of HPV-16 E7 have been described previously  
113 [26, 27].

114 The C-terminally FLAG-HA-tagged pCMV: HPV-16 E7 and GST-HPV-18 E7-expressing  
115 plasmids were kind gifts from Karl Munger [28].

### 116 2.3. Cell transient transfection

117 HEK293 cells were seeded in appropriate dishes and incubated for ~24h to a confluency of  
118 60-70%. The medium was then changed and a transfection solution containing the respective  
119 DNA (empty pCMV vector and pCMV FLAG-HA-tagged HPV-16 E7) in Tris-EDTA (TE)  
120 buffer and CaCl<sub>2</sub> (Solution A) was prepared and added dropwise to Solution B (2×HBS),  
121 followed by incubation for 30 minutes at room temperature. The transfection mixture was  
122 then added to the appropriate plate. Transfected cells were incubated at 37°C for 48h in a  
123 humidified CO<sub>2</sub> incubator and then harvested for further analysis.

124 Solution A: required amount of DNA diluted in 100µl of TE buffer + 11.2µl of 2.5M CaCl<sub>2</sub>;

125 Solution B: 100µl of 2×HBS, pH 7.12 (50mM Hepes pH 7, 280mM NaCl, 1.5mM  
126 Na<sub>2</sub>HPO<sub>4</sub>·7H<sub>2</sub>O)

### 127 2.4. Cell Viability Assay and Drug Treatments

128 Cell viability was determined by XTT assay. Briefly, 20,000 C4-1 wildtype and mutant cells  
129 per well were seeded in flat-bottomed 96-well plates in DMEM medium with 10% fetal  
130 bovine serum (FBS) and incubated overnight at 37°C, 5% CO<sub>2</sub>. Then, a series of serial  
131 dilutions (1:2) of CIGB-300 (31.25-500µM) and CX-4945 (3.125-50µM) were added in  
132 triplicate. After 48h, 50µL of XTT labeling mixture (prepared by mixing 5mL XTT labelling  
133 reagent with 0.1mL electron coupling reagent) (Roche) was added to each well and cells were  
134 further incubated for 4h at 37°C. Following the incubation period, the formazan dye formed  
135 was quantitated using an ELISA plate reader at a wavelength of 490 nm. The half-cytotoxic  
136 concentration (CC<sub>50</sub>) was estimated from the fitted dose-response curves using the CalcuSyn  
137 software (Biosoft).

### 138 *2.5. Production and purification of GST-fusion proteins*

139 The appropriate expression plasmids were transformed into *E. coli* strain BL21. The clones  
140 harboring plasmids were grown in 40mL of Luria Broth (LB) culture media containing  
141 75µg/mL Ampicillin (Sigma) overnight at 37°C. The overnight cultures were transferred into  
142 400mL culture media and incubated at 37°C for 1h. Isopropyl-β-D-thiogalactopyranoside  
143 (IPTG) was then added to a final concentration of 1mM and the culture was incubated for 3h  
144 at 37°C in a shaker. After IPTG treatment, the bacteria were harvested by centrifugation at  
145 5000rpm for 5 minutes. The bacterial pellets were lysed in 5-10ml of 1X PBS containing 1%  
146 Triton X-100 and sonicated once/twice for 30 seconds at 80% amplitude. The lysates were  
147 centrifuged at 10,000rpm for 15 minutes. Then, supernatants were collected and incubated  
148 with glutathione-conjugated agarose beads on a rotating wheel overnight at 4°C. The GST-  
149 fusion protein-conjugated beads were centrifuged at 2000 rpm for 1 minute and the  
150 supernatant was discarded. The beads were washed thrice with 1X PBS containing 1% Triton  
151 X-100. The GST-fusion protein-containing beads were then stored with 20% glycerol at -20  
152 °C until use.

### 153 *2.6. In vitro binding Assay using GST- fusion proteins*

154 Direct binding assays were performed by incubating biotin-tagged CIGB-300 (100µM) with  
155 GST-fusion proteins bound to glutathione-agarose for 1h at 4°C. After extensive washing  
156 with PBS containing 1% NP-40, the bound peptide was analyzed by SDS-PAGE with the  
157 appropriate antibody and autoradiography.

### 158 *2.7. In vitro/In vivo Pull-down Assay*

159 The E7-CIGB-300 interaction was evaluated by *in vitro/in vivo* pull-down followed by  
160 western blot experiments. For the *in vitro* pull-down, cells were seeded in 175cm dishes and  
161 incubated to a confluency of 60-70%. Afterward, cells were washed, collected and lysed in  
162 lysis buffer RGMT (50mM HEPES pH 7.4, 150mM NaCl, 1mM MgCl<sub>2</sub>, 1mM NaF, 1%  
163 Triton-x-100, plus protease inhibitor cocktail I [Calbiochem]). Cellular lysates were cleared  
164 by centrifugation and 225μL of total protein extract was incubated with biotin-tagged CIGB-  
165 300 (100μM) or biotin-tagged scrambled peptide (10mg/mL) for 2h at 4°C, then added to  
166 20μL pre-equilibrated streptavidin-coated magnetic sepharose beads (Cytiva) and incubated  
167 1h at 4°C. The beads were then collected using a magnetic rack and extensively washed with  
168 cold RGMT. The streptavidin beads bound to CIGB-300-interacting proteins were  
169 resuspended directly in 2X SDS-PAGE sample buffer, resolved on a 15% SDS-PAGE gel  
170 and analyzed by western blot.

171 For *in vivo* pull-down assays, cells were treated with biotin-tagged CIGB-300 (200μM) or  
172 PBS for 30 minute at 37°C in 5% CO<sub>2</sub>. Subsequently, cells were collected and a pull-down  
173 assay was conducted, as above. Proteins bound to streptavidin magnetic beads were eluted,  
174 resolved on a 15% SDS-PAGE gel and analyzed by western blot, as described below.

#### 175 2.9. *In vitro/in vivo phosphorylation assay*

176 For *in vitro* phosphorylation, purified GST-fusion proteins were incubated with CK2 enzyme  
177 (NEB) in 20μl kinase buffer (20mM Tris-HCl [pH 7.5], 5mM MnCl<sub>2</sub>) in the presence of  
178 10nM ATP for 15 minutes at 30°C. CIGB-300 was incubated with the GST-fusion protein on  
179 a rotating wheel for 1h before the phosphorylation reaction, while CX-4945 was added prior  
180 to the enzyme. After extensive washing with kinase wash buffer (20mM Tris-HCl [pH 7.5],  
181 5mM MnCl<sub>2</sub>, 0.1% NP-40), GST-fusion proteins were subjected to SDS-PAGE and western  
182 blot analysis using anti-phospho-16-E7 antibody.

183 HEK293 cells were seeded onto 10-cm dishes and co-transfected with 3μg of FLAG-HA-  
184 tagged HPV-16 E7 or empty vector. After 24h, cells were treated with 25μM of CX-4945 for  
185 2h and 200μM of CIGB-300 for 30 minutes, 2h and 6h at 37 °C. Cells were harvested and  
186 analyzed by western blot.

#### 187 2.10. *Immunoprecipitation assay*

188 For immunoprecipitation, HEK293 cells were transfected with FLAG-HA-tagged pCMV  
189 HPV-16 E7 plasmid and empty vector. After 48h, cells were treated with 25μM of CX-4945

190 for 2h and 200 $\mu$ M of CIGB-300 for 30 minutes at 37°C. Cells were then harvested using lysis  
191 buffer (50mM HEPES pH7.4, 150mM NaCl, 1mM MgCl<sub>2</sub>, 1mM NaF, 1% Triton-x-100,  
192 protease inhibitor cocktail I [Calbiochem) and centrifuged at 14,000rpm for 10 minutes.  
193 Supernatant was incubated with 30 $\mu$ l of monoclonal anti-HA agarose beads (Sigma) at on a  
194 rotating wheel at 4°C for 2h. After incubation, samples were washed with the lysis buffer.  
195 Immunoprecipitates were then run on SDS PAGE gels and analyzed by western blot.

### 196 *2.11. Proteins detection by Western Blot and antibodies*

197 For western blot of whole cell extracts, cells were harvested and lysed directly in 2X SDS-  
198 PAGE sample buffer. Whole cell extracts or proteins extracts from the pull-down and  
199 immunoprecipitation assays were then electrophoresed on SDS-polyacrylamide gels, and  
200 transferred to 0.22- $\mu$ m nitrocellulose membrane (Amersham). Membranes were blocked in  
201 5% non-fat milk powder dissolved in TBST (20mM Tris-HCl pH 7.5, 150mM NaCl, 0.1%  
202 Tween-20). The membrane was then probed for different proteins using the appropriate  
203 primary antibodies, i.e. mouse monoclonal anti-HA (1:500; Roche), mouse monoclonal anti-  
204 HPV-16 E7 (1:200), mouse monoclonal anti-HPV-18 E7 (1:200) from Santa Cruz  
205 Biotechnology. Mouse monoclonal anti-Rb (1:1000) (G3-245; BD Pharminge), mouse  
206 monoclonal anti- $\alpha$ -tubulin, mouse monoclonal anti-HA-peroxidase (clone HA-7), and  
207 streptavidin – HRP (1:3000) (Dako-Cytomation). HPV-16 E7 pS31/S32 peptide antibody  
208 generated by Eurogentec has been described previously [12]. The primary antibodies were  
209 followed by respective HRP-conjugated anti-mouse or anti-rabbit secondary antibody  
210 (1:2000; Dako). Detection of peroxidase activity was performed by using the Amersham  
211 ECL western blot detection kit (GE Healthcare).

### 212 *2.12. Statistical Analysis*

213 All experiments were performed at least thrice and differences between groups were  
214 determined using one-way ANOVA, followed by Dunnett's multiple comparisons test.  
215 Analysis were performed using GraphPad Prism (v6.01) software. A p value below 0.05 was  
216 considered statistically significant. For the quantification of protein levels from western blots,  
217 the band intensities were measured using Image J software.

## 218 **3. Results**

### 219 *3.1 CIGB-300 interacts with E7 protein in vitro*

220 We first investigated the putative physical interaction between CIGB-300 peptide and the E7  
221 viral protein from both high risk HPV-16/-18 and low risk HPV-11. We conducted *in vitro*  
222 pull-down experiments using biotinylated CIGB-300 and GST-fusion proteins. The peptide  
223 was incubated with GST-tagged HPV-11, -18, or -16 E7, or empty GST as negative control,  
224 followed by immunoblot analysis. The *in vitro* interaction was detected using an anti-  
225 streptavidin antibody to recognize the biotinylated peptide. Data from Figure 1A shows that  
226 CIGB-300 interacts with both HPV-16 and HPV-18 E7 oncoproteins, as well as HPV-11 E7.  
227 To look for the HPV-16 E7 region targeted by CIGB-300, we repeated the peptide interaction  
228 assay using the GST-tagged HPV-16 E7 N-terminus and GST-tagged HPV-16 E7 C-  
229 terminus. Consistent with the location of the CK2 phospho-acceptor domain, CIGB-300  
230 preferentially bound to the conserved N terminal part of the E7 protein (Figure 1B).  
231 Similarly, binding of the peptide to the HPV-16 and 18 E7 proteins was detected in cell  
232 lysates derived from CaSki, SiHa and HeLa, while no binding was detected with the  
233 scrambled peptide, further confirming the specific interaction of the peptide with E7 (Figure  
234 1C). Such binding occurred independent of the phosphorylation status of E7, since the  
235 peptide clearly interacted with E7 from C4-1 cells with the CK2 phospho-acceptor site  
236 mutated (Figure 1D).

### 237 3.2. CIGB-300 interacts with E7 protein *in vivo*

238 Having shown that CIGB-300 interacts with E7 *in vitro*, we wanted to assess the interaction  
239 in a relevant cellular context. Accordingly, we conducted *in vivo* pull-down assays using  
240 HEK293 cells transfected with constructs expressing FLAG-HA-tagged HPV-16 E7 or HPV-  
241 18 E7. The data shown in Figure 2A clearly indicate that the CIGB-300 peptide binds to both  
242 HPV-16 and HPV-18 E7, confirming the results obtained *in vitro*. Additionally, we also  
243 explored the 16 E7-CIGB-300 interaction in a cervical cancer-derived cell line CaSki, where  
244 similar results were observed (Figure 2B).

### 245 3.3 Inhibition of E7 phosphorylation is not essential for CIGB-300's cytotoxicity to cervical 246 cancer cells

247 To investigate the effect of CIGB-300 on the CK2-mediated phosphorylation of E7, we  
248 conducted western blot analysis using GST-fusion proteins and total cell extracts derived  
249 from HEK293 cells overexpressing FLAG-HA-tagged HPV-16 E7. Using a specific anti-  
250 HPV-16 E7(S31/S32) antibody, we confirmed the *in vitro* inhibitory effect of CIGB-300 on  
251 E7 phosphorylation (Figure 3A). Accordingly, CIGB-300 inhibited nearly 40% of *in vivo* E7



252 phosphorylation assay after 30 minutes' treatment (Figure 3B). CX-4945 compound was  
253 included in this assay as a reference for the global inhibition of CK2-mediated mediated  
254 phosphorylation in the cells (Figure 3B).

255 Having demonstrated that CIGB-300 can inhibit CK2-mediated phosphorylation of the  
256 S31/S32 residues of E7, we explored the relevance of such inhibition for the cytotoxic effect  
257 of CIGB-300, using C4-1 cells expressing E7 that is mutated at the CK2 phospho-acceptor  
258 site. These cells were generated by a genome-editing approach in which the S32/S34 amino  
259 acid residues of E7 were changed to A32/A34, thereby impairing E7's susceptibility to  
260 phosphorylation [12]. The impact of CIGB-300 on the cell viability of the wildtype C4-1  
261 cells and the mutant clones, A15 and B8, was assessed by XTT assay. Figure 3C shows the  
262 corresponding dose-response curve in the presence of CIGB-300 and CX-4945. Both CK2  
263 inhibitors showed a similar response, with a clear trend of decreasing cytotoxic effect at  
264 higher doses ( $>CC_{50}$ ) in the mutant cells, compared with the wildtype C4-1 cells. The mutant  
265 cells seem to be more resistant to CIGB-300 treatment, with  $CC_{50}$  values of 200 $\mu$ M and  
266 259 $\mu$ M for wildtype C4-1 and A15 CK2 mutant cells, respectively). Our results show that the  
267 ability to target E7 phosphorylation is not an essential molecular event for the cytotoxicity of  
268 CK2 inhibitors in cervical cancer cells.

### 269 *3.4 CIGB-300 affects HPV-16 E7-pRB complex formation*

270 CIGB-300 was initially designed to bind the CK2 phospho-acceptor domain of HPV-16 E7  
271 and, as we confirmed here, it binds preferentially to the N-terminal region of E7, near to the  
272 pRB binding domain (Cys24). To determine whether the peptide disrupts the binding of  
273 HPV-16 E7 to pRB, we performed immunoprecipitation analysis of HEK293 cells transfected  
274 with constructs expressing FLAG-HA-tagged HPV-16 E7, or empty vector as a negative  
275 control. We observed a clear decrease of pRB signal in the HPV-16 E7 immunoprecipitated  
276 fraction after the treatment with either the known CK2 inhibitor CX-4945 or with CIGB-300  
277 (Figure 4). This result indicates that CIGB-300 can disrupt the binding between the HPV-16  
278 E7 and pRB protein *in vitro*.

## 279 **4. Discussion**

280 In addition to the standard regimen for cervical cancer treatment, new anticancer agents based  
281 on targeting the molecular pathways dysregulated in cervical cancer have emerged as  
282 strategies with great potential. Protein kinase CK2 has been shown to be involved in the  
283 regulation of cellular and viral proteins relevant for this malignancy [29, 30]. For example, in

284 head-and-neck squamous cell carcinoma, CK2 is associated with aggressive tumour  
285 behaviour and poor clinical outcome, which reinforces the rationale for exploring the use of  
286 CK2 inhibitors in the clinical setting [31-33]. Recently, it has been shown that CK2 activity is  
287 required for efficient transient and stable replication of various HPV types [34]. Two  
288 molecules targeting CK2-mediated signaling, namely CX-4945/Silmitasertib and CIGB-300  
289 have shown antineoplastic potential and good synergy and/or additivity with cisplatin in  
290 cervical cancer treatment [35, 36]. The clinically useful effects of the anti-CK2 peptide  
291 CIGB-300 have been demonstrated in a phase I/II clinical trial in women with locally  
292 advanced cervical cancer [21-23], however the molecular basis of this clinical effect is still  
293 relatively unexplored.

294 Although the development of CIGB-300 as a potential therapeutic arose from its ability to  
295 block HPV-16 E7 phosphorylation, its putative physical interaction with the viral oncoprotein  
296 in the cellular context remained to be confirmed. Here, we show for the first time, using *in*  
297 *vitro* pull-down assays, a clear physical interaction between HPV-16 E7 at a relevant  
298 therapeutic dose of CIGB-300. Importantly, that interaction was also confirmed for the E7  
299 protein from the HPV-18 and HPV-11 types, which would support the clinical benefit of  
300 CIGB-300 in patients with HPV-18-positive tumours and those with low risk HPV-infected  
301 lesions. To further evaluate the *in vivo* CIGB-300-E7 interaction between both molecules, we  
302 performed *in vivo* pull-down. We employed HEK293 as an epithelial cell model with high  
303 transfection efficiency that has been previously used for studying E6 and E7 interaction  
304 partners [37]. Using HEK293 cells overexpressing HPV-16 E7, we observed physical  
305 interaction between CIGB-300 and E7 protein. The *in vivo* binding of the peptide with E7  
306 was also seen in a cervical cell type, confirming the suitability of the HEK293 line for this  
307 type of studies.

308 The *in vitro* inhibition of HPV-16 E7 CK2-mediated phosphorylation by CIGB-300 has  
309 previously been documented; here we examined the *in vivo* effect of the peptide on E7  
310 phosphorylation using HEK293 cells. Analysis of the phosphorylation of the Ser31/Ser32  
311 phospho-site in E7 after treatment with CIGB-300 showed approximately 40% inhibition  
312 after 30 minutes' treatment. Considering that E7 is differentially phosphorylated by CK2  
313 during the cell cycle at G<sub>1</sub> phase [38], it remains to be determined whether the inhibitory  
314 effect of CIGB-300 on E7 phosphorylation could change according to the cell cycle phase.  
315 Recent studies by Basukala et al, using genome editing of cervical cancer-derived C4-1 cells,  
316 have shown the relevance of the CK2 phospho-acceptor site in HPV-18 E7 for maintaining a

317 fully-transformed phenotype. To further investigate the contribution of E7 phosphorylation  
318 inhibition for the cytotoxic effect induced by CIGB-300 in cervical cancer, we exploited  
319 CRISPR-edited cells with a mutation within HPV-18 E7's CK2 phospho-acceptor site. Our  
320 data demonstrate that CIGB-300 has a potent dose-dependent cytotoxic effect on C4-1 cells.  
321 Consistent with the modest effect of CIGB-300 on E7 phosphorylation, these mutant C4-1  
322 cells did not show a clear difference in the cytotoxic effect mediated by CIGB-300. Taken  
323 together, these results indicate that targeting the molecular event of E7 phosphorylation is  
324 not a major contributor to the cell death triggered by CIGB-300. However, our data do not  
325 rule out that inhibition of E7 phosphorylation by CIGB-300 could be relevant for reducing  
326 the proliferative and invasive potential of the transformed cell lines.

327 Previous studies had indicated that CK2-mediated phosphorylation of E7 is required for  
328 pocket protein recognition [8]. The best-characterized E7 ligand is pRB and an impairment of  
329 the E7-pRB interaction has been shown in mutant E7 CK2 phospho-site cell lines [12].  
330 Correspondingly, we wanted to explore the putative effect of CIGB-300 on the interaction of  
331 E7 with the tumor suppressor pRB. Using co-immunoprecipitation assays in HEK293 model,  
332 we found a clear decrease of the binding of pRB to E7 after treatment with CK2 inhibitor  
333 CX-4945 and CIGB-300. HPV E7-pRB association abolishes the transcriptional repressor  
334 activity of pRB/E2F complexes, causing a dysregulated expression of E2F target genes [39].  
335 Therefore, the antineoplastic effect of CIGB-300 might be supported in part by targeting E7  
336 and rescuing the tumour-suppressive activity of pRB. Our current studies aim to explore other  
337 E7-associated proteins affected by CIGB-300.

338 In conclusion, we have demonstrated for the first time that CIGB-300 targets of E7 proteins  
339 from high- and low-risk HPV types. The effect of CIGB-300 on E7 phosphorylation was  
340 modest; however, the interaction of the peptide with E7 seems to affect HPV-16 E7 protein  
341 function by disrupting its interaction with pRB. Our study reveals novel molecular clues to  
342 the mechanism of action of CIGB-300 in cervical cancer.

## 343 **5. Author statements**

344 Conceptualization, S.E.P., L.B. Y.P.; methodology, A.C.R. and P.M.; formal analysis, A.C.R.  
345 and O.B.; investigation, A.C.R., O.B. and P.M; writing—original draft preparation, A.C.R.;  
346 writing—review and editing, S.E.P., M.T. and L.B.; supervision, S.E.P. and L.B.; project  
347 administration, S.E.P. and L.B. All authors have read and agreed to the published version of  
348 the manuscript.

349 **Funding:** Ailyn C. Ramón and Om Basukala are recipient of an ICGEB Arturo Falaschi  
350 Fellowship; Lawrence Banks is the recipient of Grant no. IG 2019-ID.23572 from the  
351 Association Italiana per la Ricerca sul Cancro.

352 **Institutional Review Board Statement:** Not applicable.

353 **Informed Consent Statement:** Not applicable.

354 **Acknowledgments:** The authors would like to thank Karl Mürger for the gift of the  
355 pCMV:HPV-16 E7-FLAG-HA and pGEX:HPV-18 E7 plasmids.

356 **Conflicts of Interest:** The authors declare no conflict of interest.

357 All authors have read and agreed to the published version of the manuscript.

358

## 359 **6. References**

360 1. Egawa, N.; Egawa, K.; Griffin, H.; Doorbar, J., Human Papillomaviruses; Epithelial  
361 Tropisms, and the Development of Neoplasia. *Viruses* **2015**, *7*, (7), 3863-90.  
362 doi:10.3390/v7072802

363 2. Arbyn, M.; Weiderpass, E.; Bruni, L.; de Sanjosé, S.; Saraiya, M.; Ferlay, J.; Bray, F.,  
364 Estimates of incidence and mortality of cervical cancer in 2018: a worldwide analysis. *The*  
365 *Lancet. Global health* **2020**, *8*, (2), e191-e203. doi:10.1016/s2214-109x(19)30482-6

366 3. Waheed, D. E.; Schiller, J.; Stanley, M.; Franco, E. L.; Poljak, M.; Kjaer, S. K.; Del  
367 Pino, M.; van der Klis, F.; Schim van der Loeff, M. F.; Baay, M.; Van Damme, P.; Vorsters,  
368 A., Human papillomavirus vaccination in adults: impact, opportunities and challenges - a  
369 meeting report. *BMC proceedings* **2021**, *15*, (Suppl 7), 16. doi:10.1186/s12919-021-00217-4

370 4. Liu, L.; Wang, M.; Li, X.; Yin, S.; Wang, B., An Overview of Novel Agents for  
371 Cervical Cancer Treatment by Inducing Apoptosis: Emerging Drugs Ongoing Clinical Trials  
372 and Preclinical Studies. *Frontiers in medicine* **2021**, *8*, 682366.  
373 doi:10.3389/fmed.2021.682366

374 5. Doorbar, J.; Quint, W.; Banks, L.; Bravo, I. G.; Stoler, M.; Broker, T. R.; Stanley, M.  
375 A., The biology and life-cycle of human papillomaviruses. *Vaccine* **2012**, *30* Suppl 5, F55-  
376 70. doi:10.1016/j.vaccine.2012.06.083

- 377 6. Roman, A.; Munger, K., The papillomavirus E7 proteins. *Virology* **2013**, 445, (1-2),  
378 138-68. doi:10.1016/j.virol.2013.04.013
- 379 7. Vande Pol, S. B.; Klingelutz, A. J., Papillomavirus E6 oncoproteins. *Virology* **2013**,  
380 445, (1-2), 115-37. doi:10.1016/j.virol.2013.04.026
- 381 8. Huh, K.; Zhou, X.; Hayakawa, H.; Cho, J. Y.; Libermann, T. A.; Jin, J.; Harper, J. W.;  
382 Munger, K., Human papillomavirus type 16 E7 oncoprotein associates with the cullin 2  
383 ubiquitin ligase complex, which contributes to degradation of the retinoblastoma tumor  
384 suppressor. *Journal of virology* **2007**, 81, (18), 9737-47. doi:10.1128/jvi.00881-07
- 385 9. Poirson, J.; Biquand, E.; Straub, M. L.; Cassonnet, P.; Nominé, Y.; Jones, L.; van der  
386 Werf, S.; Travé, G.; Zanier, K.; Jacob, Y.; Demeret, C.; Masson, M., Mapping the  
387 interactome of HPV E6 and E7 oncoproteins with the ubiquitin-proteasome system. *The*  
388 *FEBS journal* **2017**, 284, (19), 3171-3201. doi:10.1111/febs.14193
- 389 10. Firzloff, J. M.; Lüscher, B.; Eisenman, R. N., Negative charge at the casein kinase II  
390 phosphorylation site is important for transformation but not for Rb protein binding by the E7  
391 protein of human papillomavirus type 16. *Proceedings of the National Academy of Sciences*  
392 *of the United States of America* **1991**, 88, (12), 5187-91. doi:10.1073/pnas.88.12.5187
- 393 11. Massimi, P.; Pim, D.; Storey, A.; Banks, L., HPV-16 E7 and adenovirus E1a complex  
394 formation with TATA box binding protein is enhanced by casein kinase II phosphorylation.  
395 *Oncogene* **1996**, 12, (11), 2325-30.
- 396 12. Basukala, O.; Mittal, S.; Massimi, P.; Bestagno, M.; Banks, L., The HPV-18 E7 CKII  
397 phospho acceptor site is required for maintaining the transformed phenotype of cervical  
398 tumour-derived cells. *PLoS pathogens* **2019**, 15, (5), e1007769.  
399 doi:10.1371/journal.ppat.1007769
- 400 13. Perea, S. E.; Reyes, O.; Puchades, Y.; Mendoza, O.; Vispo, N. S.; Torrens, I.; Santos,  
401 A.; Silva, R.; Acevedo, B.; López, E.; Falcón, V.; Alonso, D. F., Antitumor effect of a novel  
402 proapoptotic peptide that impairs the phosphorylation by the protein kinase 2 (casein kinase  
403 2). *Cancer research* **2004**, 64, (19), 7127-9. doi:10.1158/0008-5472.Can-04-2086
- 404 14. Perera, Y.; Ramos, Y.; Padrón, G.; Caballero, E.; Guirola, O.; Caligiuri, L. G.;  
405 Lorenzo, N.; Gottardo, F.; Farina, H. G.; Filhol, O.; Cochet, C.; Perea, S. E., CIGB-300

- 406 anticancer peptide regulates the protein kinase CK2-dependent phosphoproteome. *Molecular*  
407 *and cellular biochemistry* **2020**, 470, (1-2), 63-75. doi:10.1007/s11010-020-03747-1
- 408 15. Rosales, M.; Pérez, G. V.; Ramón, A. C.; Cruz, Y.; Rodríguez-Ulloa, A.; Besada, V.;  
409 Ramos, Y.; Vázquez-Blomquist, D.; Caballero, E.; Aguilar, D.; González, L. J.; Zettl, K.;  
410 Wiśniewski, J. R.; Yang, K.; Perera, Y.; Perea, S. E., Targeting of Protein Kinase CK2 in  
411 Acute Myeloid Leukemia Cells Using the Clinical-Grade Synthetic-Peptide CIGB-300.  
412 *Biomedicines* **2021**, 9, (7). doi:10.3390/biomedicines9070766
- 413 16. Perera, Y.; Farina, H. G.; Gil, J.; Rodriguez, A.; Benavent, F.; Castellanos, L.;  
414 Gómez, R. E.; Acevedo, B. E.; Alonso, D. F.; Perea, S. E., Anticancer peptide CIGB-300  
415 binds to nucleophosmin/B23, impairs its CK2-mediated phosphorylation, and leads to  
416 apoptosis through its nucleolar disassembly activity. *Molecular cancer therapeutics* **2009**, 8,  
417 (5), 1189-96. doi:10.1158/1535-7163.Mct-08-1056
- 418 17. Perera, Y.; Costales, H. C.; Diaz, Y.; Reyes, O.; Farina, H. G.; Mendez, L.; Gómez,  
419 R. E.; Acevedo, B. E.; Gomez, D. E.; Alonso, D. F.; Perea, S. E., Sensitivity of tumor cells  
420 towards CIGB-300 anticancer peptide relies on its nucleolar localization. *Journal of peptide*  
421 *science : an official publication of the European Peptide Society* **2012**, 18, (4), 215-23.  
422 doi:10.1002/psc.1432
- 423 18. Águila, J. D. F.; Vega, Y. G.; Jiménez, R. O. R.; Sacerio, A. L.; Rodríguez, C. R. R.;  
424 Fraga, Y. R.; Silva, C. V., Safety of intravenous application of cigb-300 in patients with  
425 hematological malignancies. EHPMA study. *Revista Cubana de Hematología, Inmunología y*  
426 *Hemoterapia* **2016**, 32, (2), 236-248.
- 427 19. García-Diegues, R.; de la Torre-Santos, A., Phase I Study of CIGB-300 Administered  
428 Intravenously in Patients with Relapsed/Refractory Solid Tumors. *ARCHIVOS DE*  
429 *MEDICINA*  
430 **2018**, 1, (1), 4.
- 431 20. Cruz, L. R.; Baladrón, I.; Rittoles, A.; Díaz, P. A.; Valenzuela, C.; Santana, R.;  
432 Vázquez, M. M.; García, A.; Chacón, D.; Thompson, D.; Perera, G.; González, A.; Reyes, R.;  
433 Torres, L.; Pérez, J.; Valido, Y.; Rodriguez, R.; Vázquez-Bloomquist, D. M.; Rosales, M.;  
434 Ramón, A. C.; Pérez, G. V.; Guillén, G.; Muzio, V.; Perera, Y.; Perea, S. E., Treatment with  
435 an Anti-CK2 Synthetic Peptide Improves Clinical Response in COVID-19 Patients with

- 436 Pneumonia. A Randomized and Controlled Clinical Trial. *ACS pharmacology & translational*  
437 *science* **2021**, 4, (1), 206-212. doi:10.1021/acsptsci.0c00175
- 438 21. Solares, A. M.; Santana, A.; Baladrón, I.; Valenzuela, C.; González, C. A.; Díaz, A.;  
439 Castillo, D.; Ramos, T.; Gómez, R.; Alonso, D. F.; Herrera, L.; Sigman, H.; Perea, S. E.;  
440 Acevedo, B. E.; López-Saura, P., Safety and preliminary efficacy data of a novel casein  
441 kinase 2 (CK2) peptide inhibitor administered intralesionally at four dose levels in patients  
442 with cervical malignancies. *BMC cancer* **2009**, 9, 146. doi:10.1186/1471-2407-9-146
- 443 22. Soriano-García, J.; López-Díaz, A.; Solares-Asteasuainzarra, M.; Baladrón-Castrillo,  
444 I.; Batista-Albuerne, N.; García-García, I.; González-Méndez, L.; Perera-Negrín, Y.;  
445 Valenzuela-Silva, C.; Pedro, A. J. J. C. R. T., Pharmacological and safety evaluation of  
446 CIGB-300, a casein kinase 2 inhibitor peptide, administered intralesionally to patients with  
447 cervical cancer stage IB2/II. **2013**, 1, (6), 163-173.
- 448 23. Sarduy, M. R.; García, I.; Coca, M. A.; Perera, A.; Torres, L. A.; Valenzuela, C. M.;  
449 Baladrón, I.; Solares, M.; Reyes, V.; Hernández, I.; Perera, Y.; Martínez, Y. M.; Molina, L.;  
450 González, Y. M.; Ancizar, J. A.; Prats, A.; González, L.; Casacó, C. A.; Acevedo, B. E.;  
451 López-Saura, P. A.; Alonso, D. F.; Gómez, R.; Perea-Rodríguez, S. E., Optimizing CIGB-300  
452 intralesional delivery in locally advanced cervical cancer. *British journal of cancer* **2015**,  
453 112, (10), 1636-43. doi:10.1038/bjc.2015.137
- 454 24. Perea, S. E.; Baladrón, I.; Valenzuela, C.; Perera, Y., CIGB-300: A peptide-based  
455 drug that impairs the Protein Kinase CK2-mediated phosphorylation. *Seminars in oncology*  
456 **2018**, 45, (1-2), 58-67. doi:10.1053/j.seminoncol.2018.04.006
- 457 25. Perera, Y.; Melão, A.; Ramón, A. C.; Vázquez, D.; Ribeiro, D.; Perea, S. E.; Barata, J.  
458 T., Clinical-Grade Peptide-Based Inhibition of CK2 Blocks Viability and Proliferation of T-  
459 ALL Cells and Counteracts IL-7 Stimulation and Stromal Support. *Cancers* **2020**, 12, (6).  
460 doi:10.3390/cancers12061377
- 461 26. Pim, D.; Massimi, P.; Dilworth, S. M.; Banks, L., Activation of the protein kinase B  
462 pathway by the HPV-16 E7 oncoprotein occurs through a mechanism involving interaction  
463 with PP2A. *Oncogene* **2005**, 24, (53), 7830-8. doi:10.1038/sj.onc.1208935
- 464 27. Szalmás, A.; Tomaić, V.; Basukala, O.; Massimi, P.; Mittal, S.; Kónya, J.; Banks, L.,  
465 The PTPN14 Tumor Suppressor Is a Degradation Target of Human Papillomavirus E7.  
466 *Journal of virology* **2017**, 91, (7). doi:10.1128/jvi.00057-17

- 467 28. Gonzalez, S. L.; Stremlau, M.; He, X.; Basile, J. R.; Münger, K., Degradation of the  
468 retinoblastoma tumor suppressor by the human papillomavirus type 16 E7 oncoprotein is  
469 important for functional inactivation and is separable from proteasomal degradation of E7.  
470 *Journal of virology* **2001**, 75, (16), 7583-91. doi:10.1128/jvi.75.16.7583-7591.2001
- 471 29. Keating, J. A.; Striker, R., Phosphorylation events during viral infections provide  
472 potential therapeutic targets. *Reviews in medical virology* **2012**, 22, (3), 166-81.  
473 doi:10.1002/rmv.722
- 474 30. Borgo, C.; D'Amore, C.; Sarno, S.; Salvi, M.; Ruzzene, M., Protein kinase CK2: a  
475 potential therapeutic target for diverse human diseases. *Signal transduction and targeted*  
476 *therapy* **2021**, 6, (1), 183. doi:10.1038/s41392-021-00567-7
- 477 31. Gapany, M.; Faust, R. A.; Tawfic, S.; Davis, A.; Adams, G. L.; Ahmed, K.,  
478 Association of elevated protein kinase CK2 activity with aggressive behavior of squamous  
479 cell carcinoma of the head and neck. *Molecular medicine (Cambridge, Mass.)* **1995**, 1, (6),  
480 659-66.
- 481 32. Faust, R. A.; Gapany, M.; Tristani, P.; Davis, A.; Adams, G. L.; Ahmed, K., Elevated  
482 protein kinase CK2 activity in chromatin of head and neck tumors: association with  
483 malignant transformation. *Cancer letters* **1996**, 101, (1), 31-5. doi:10.1016/0304-  
484 3835(96)04110-9
- 485 33. Chua, M. M. J.; Lee, M.; Dominguez, I., Cancer-type dependent expression of CK2  
486 transcripts. *PloS one* **2017**, 12, (12), e0188854. doi:10.1371/journal.pone.0188854
- 487 34. Piirsoo, A.; Piirsoo, M.; Kala, M.; Sankovski, E.; Lototskaja, E.; Levin, V.; Salvi, M.;  
488 Ustav, M., Activity of CK2 $\alpha$  protein kinase is required for efficient replication of some HPV  
489 types. *PLoS pathogens* **2019**, 15, (5), e1007788. doi:10.1371/journal.ppat.1007788
- 490 35. Perera, Y.; Toro, N. D.; Gorovaya, L.; Fernandez, D. E. C. J.; Farina, H. G.; Perea, S.  
491 E., Synergistic interactions of the anti-casein kinase 2 CIGB-300 peptide and  
492 chemotherapeutic agents in lung and cervical preclinical cancer models. *Molecular and*  
493 *clinical oncology* **2014**, 2, (6), 935-944. doi:10.3892/mco.2014.338
- 494 36. Trembley, J. H.; Li, B.; Kren, B. T.; Gravely, A. A.; Caicedo-Granados, E.; Klein, M.  
495 A.; Ahmed, K., CX-4945 and siRNA-Mediated Knockdown of CK2 Improves Cisplatin



496 Response in HPV(+) and HPV(-) HNSCC Cell Lines. *Biomedicines* **2021**, 9, (5).  
497 doi:10.3390/biomedicines9050571

498 37. Na Rangsee, N.; Yanatatsaneejit, P.; Pisitkun, T.; Somparn, P.; Jintaridth, P.;  
499 Topanurak, S., Host proteome linked to HPV E7-mediated specific gene hypermethylation in  
500 cancer pathways. *Infectious agents and cancer* **2020**, 15, 7. doi:10.1186/s13027-020-0271-4

501 38. Massimi, P.; Banks, L., Differential phosphorylation of the HPV-16 E7 oncoprotein  
502 during the cell cycle. *Virology* **2000**, 276, (2), 388-94. doi:10.1006/viro.2000.0514

503 39. Avvakumov, N.; Torchia, J.; Mymryk, J. S., Interaction of the HPV E7 proteins with  
504 the pCAF acetyltransferase. *Oncogene* **2003**, 22, (25), 3833-41. doi:10.1038/sj.onc.1206562

505

## 506 Figures and Tables

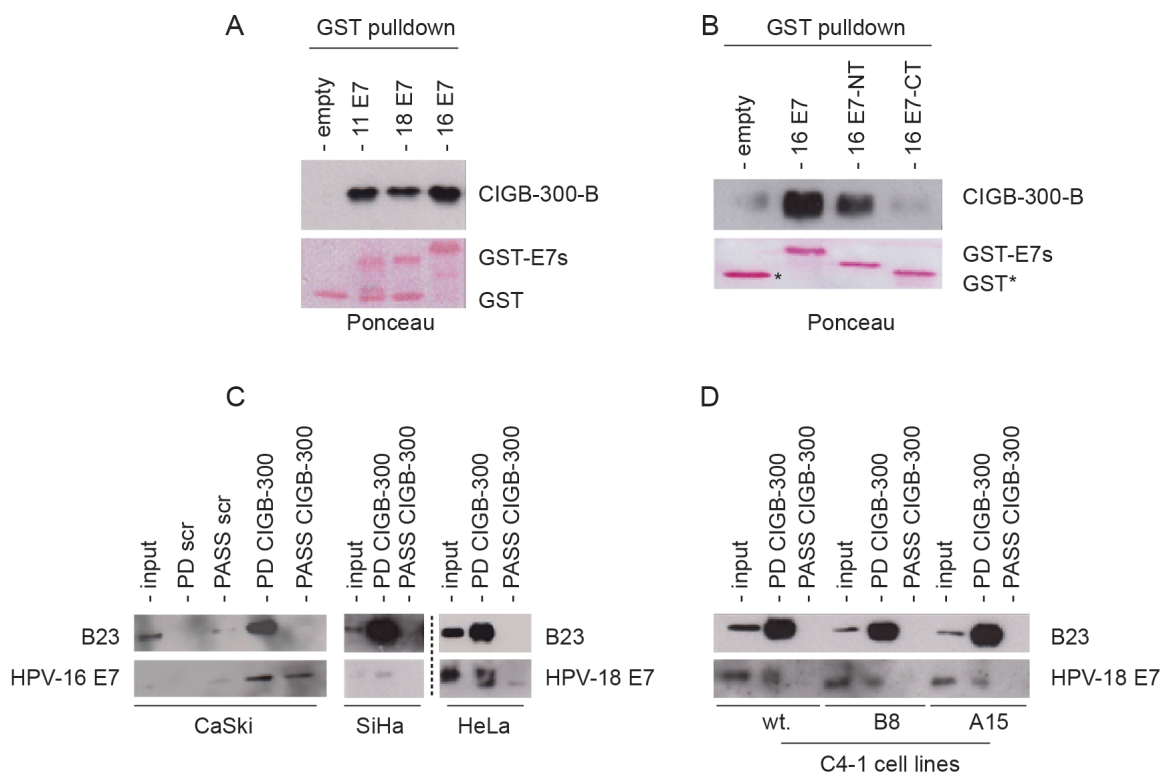

507

508 **Figure 1.** *In vitro* physical interaction of CIGB-300 with E7 protein. Western blot analysis of *in vitro* pull-down  
509 fractions using CIGB-300 and scrambled peptide, both conjugated to biotin as bait to capture interacting  
510 proteins. GST pull-down was carried out using the purified GST-tagged E7 from HPV-11, HPV-16, HPV-18  
511 (A) and HPV-16 E7 N-terminus and HPV-16 E7 C-terminus (B). GST fusion proteins were incubated 1h with  
512 CIGB-300, then the CIGB-300-E7 interaction was resolved on 20%-SDS-PAGE and subjected to western blot.  
513 The top panels show the immunoblot analysis for CIGB-300 using an anti-streptavidin antibody, and the lower  
514 panels show the Ponceau stain for different GST-fusion proteins. *In vitro* pull-down was performed with cellular

515 lysates from CaSki, SiHa, HeLa (C), and C4-1 wildtype and mutant cells (D) incubated 1h with CIGB-300  
 516 (100 $\mu$ M). Subsequently, 20 $\mu$ L of streptavidin magnetic beads were added to each reaction and the CIGB-300  
 517 interacting proteins were eluted, resolved on 15%-SDS-PAGE and subjected to western blot. The scrambled  
 518 control peptide sequence is a stretch of 10 random amino acids. Input: cellular extract. PD: pull-down fractions.  
 519 PASS: flow-through fraction.

520

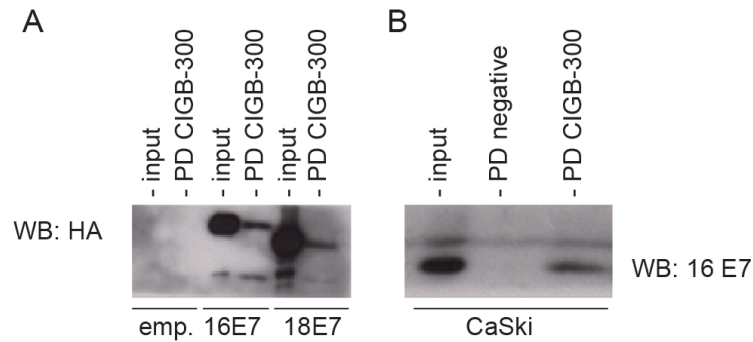

521

522 **Figure 2:** *In vivo* interaction of CIGB-300 with E7 protein. FLAG-HA-tagged HPV-16 E7 was overexpressed in  
 523 HEK293 (A) and CaSki (B) cells. Cells were treated with biotin-tagged CIGB-300 (200 $\mu$ M) for 30 minutes and  
 524 then processed as described in “materials and methods”. CIGB-300-interacting proteins were separated by SDS-  
 525 PAGE and immunoblotted, using anti-HA-tag and anti-HPV-16 E7 antibodies for HEK293 and CaSki  
 526 respectively. PD: pull-down fractions; NC: negative control (cells incubated with empty vector).

527

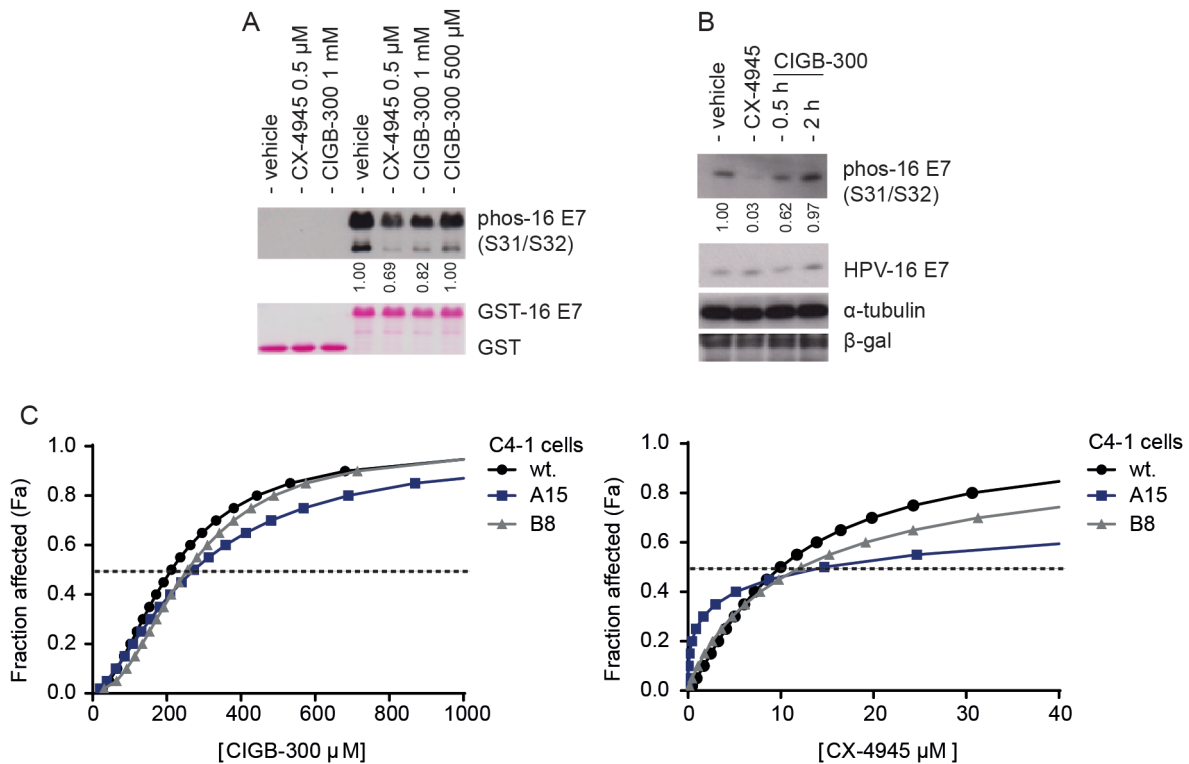

528

529 **Figure 3.** Impact of targeting HPV-16 E7 CK2-mediated phosphorylation on the cytotoxic effect of CIGB-300.  
530 A. *In vitro* phosphorylation assay, using purified GST-HPV-16 E7 fusion proteins incubated with purified CK2  
531 enzyme, in the presence of ATP and CK2 inhibitors. Samples were analyzed by western blot using antibody  
532 specific for phosphorylated HPV-16 E7 (S31/S32) (Top panel). The bottom panel shows the Ponceau-stained  
533 membrane, indicating the total levels of GST-fusion E7 protein and GST control. B. *In vivo* phosphorylation  
534 assay using E7-overexpressing HEK293 cells. Cells were treated with CK2 inhibitor CIGB-300 (200 $\mu$ M) and  
535 CX-4945 (25 $\mu$ M) for 30 minutes and 2h respectively. The cells were then harvested directly in 2X sample  
536 buffer and resolved on 15%-SDS-PAGE and subjected to western blot analysis to identify phosphorylated E7  
537 and total protein levels with anti-HA.  $\beta$ -gal was employed as a loading control. C. Effect of CIGB-300 on cell  
538 viability on wildtype and mutant C4-1 cells, using an XTT assay. The indicated cervical cancer cell lines were  
539 cultured for 48h with increasing concentrations of CIGB-300 and CX-4945. CC<sub>50</sub> was estimated from the fitted  
540 dose-response curves based on treatment with five CK2 inhibitor concentrations, as determined by cell viability  
541 assay.

542

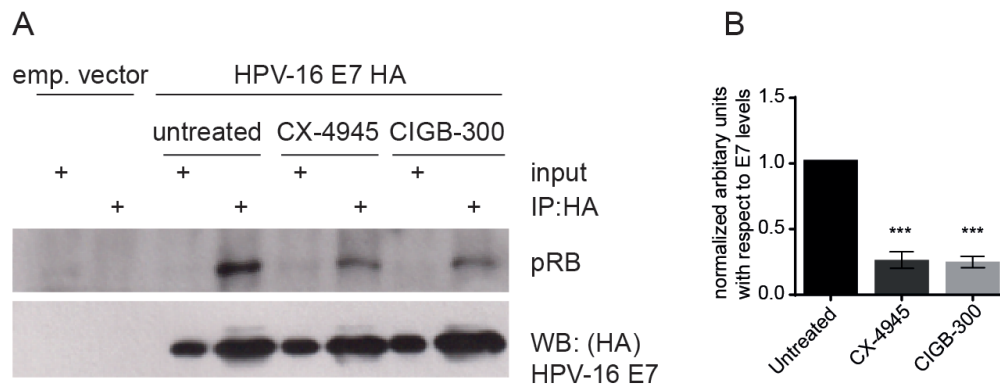

543

544 **Figure 4.** A. Effect of inhibiting CK2 activity on the E7-pRB interaction. HEK293 cells were transfected with  
545 empty pCMV vector or pCMV:FLAG-HA-HPV-16 E7. The cell lysates were immunoprecipitated using anti-  
546 HA antibody immobilized on agarose beads. (A). Immunoprecipitated complexes were then washed with lysis  
547 buffer and analyzed by western blot for pRB, and total E7. The panel shows the protein inputs and the results of  
548 immunoprecipitation. (B) Quantification of the levels of pRB immunoprecipitated with respect to levels of E7 in  
549 the presence of CK2 inhibitors. Data are shown as means  $\pm$  SD, n=3. Statistically significant differences  
550 between vehicle and drug treatment are represented as \*\*\* p < 0.001 determined using one-way ANOVA  
551 followed by Dunnett post-test.

552

553

554

555
